# Supplementary material for: Investigation of the Initial Host Response of Naïve Atlantic Salmon (Salmo salar) Inoculated with Paramoeba perurans
Source: MDPI journal article supplement (doi:10.3390/microorganisms9040746), 2021-04-02
Supplement: s1 [file s1]

A

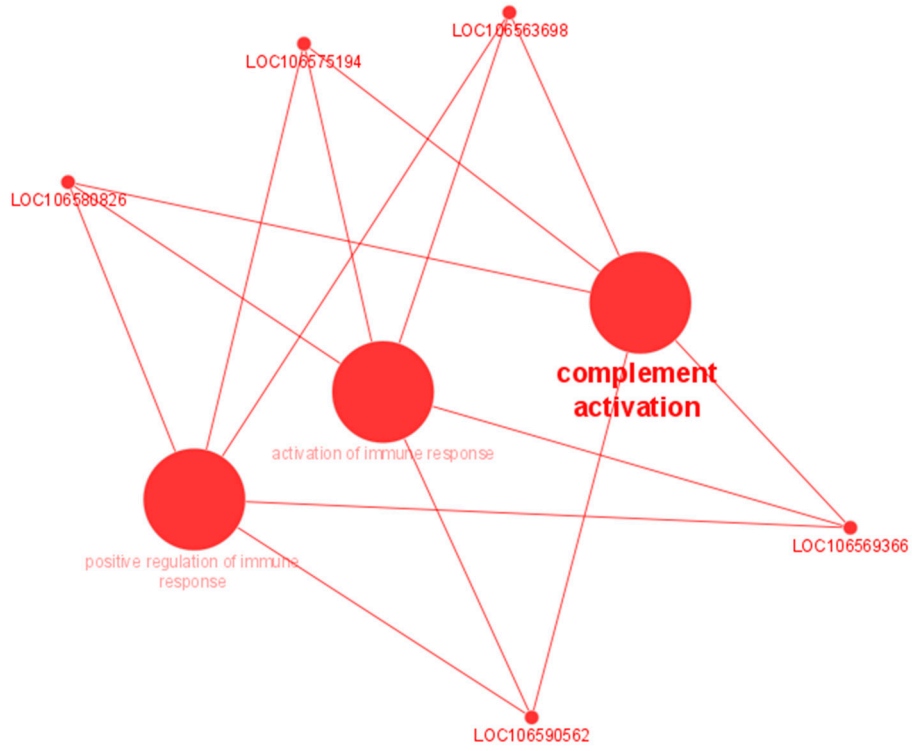

B

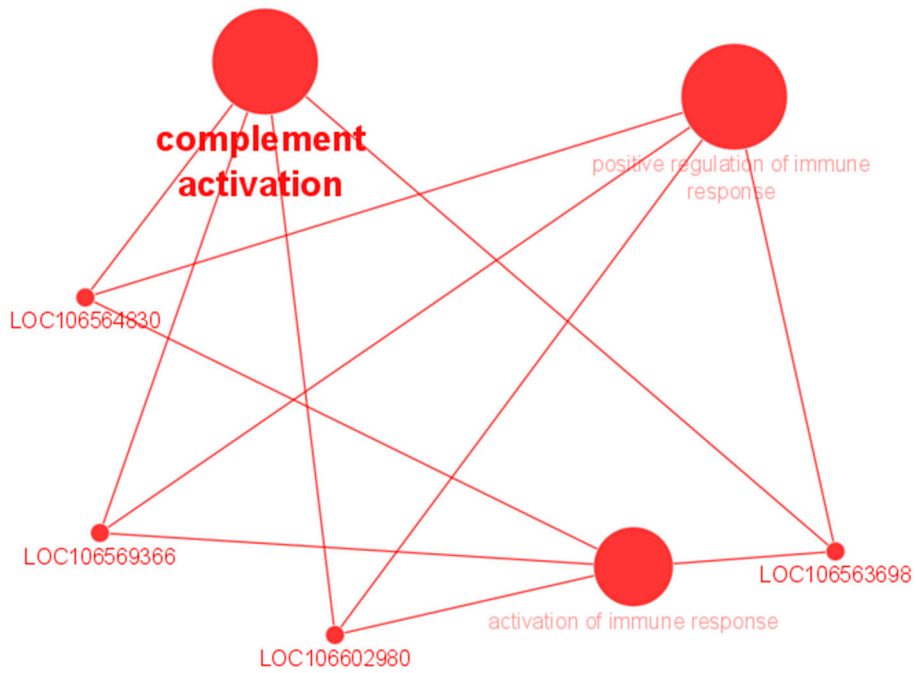

C

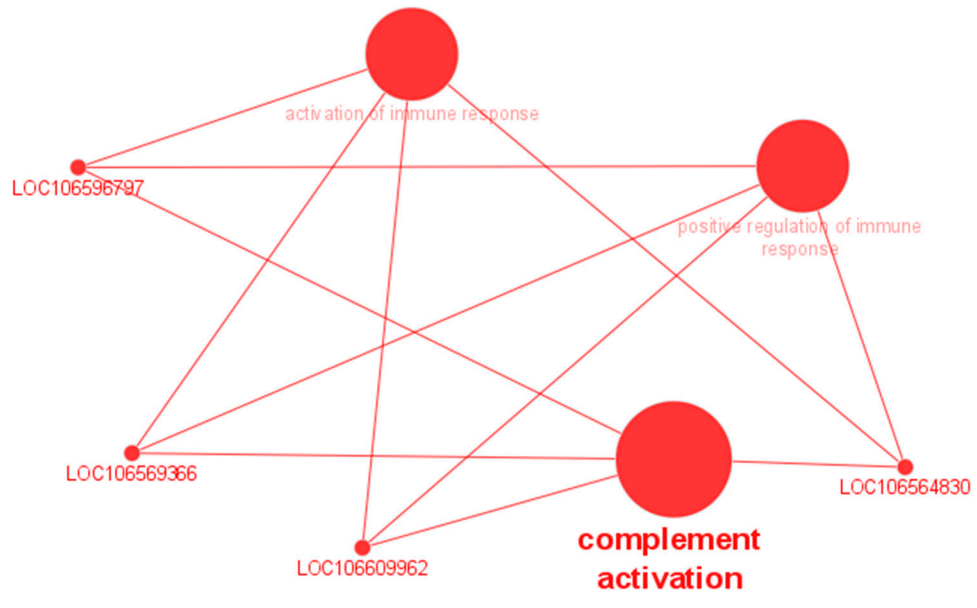

D

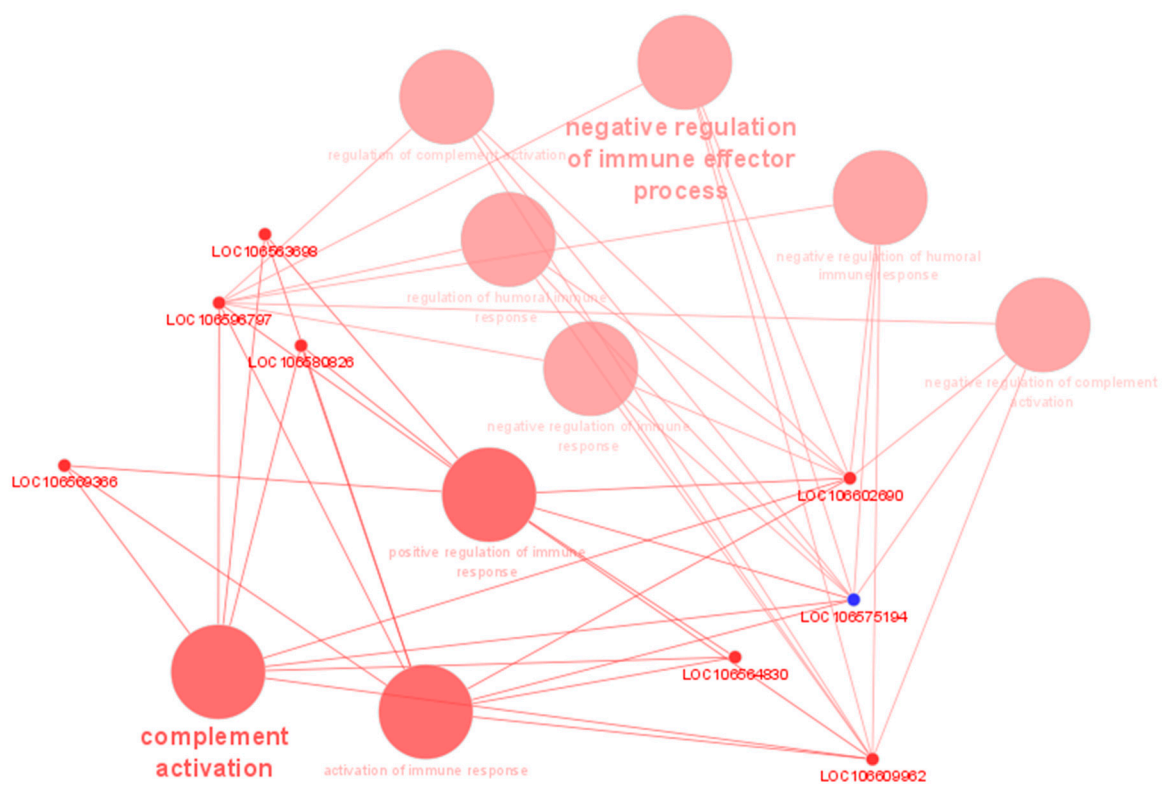

E

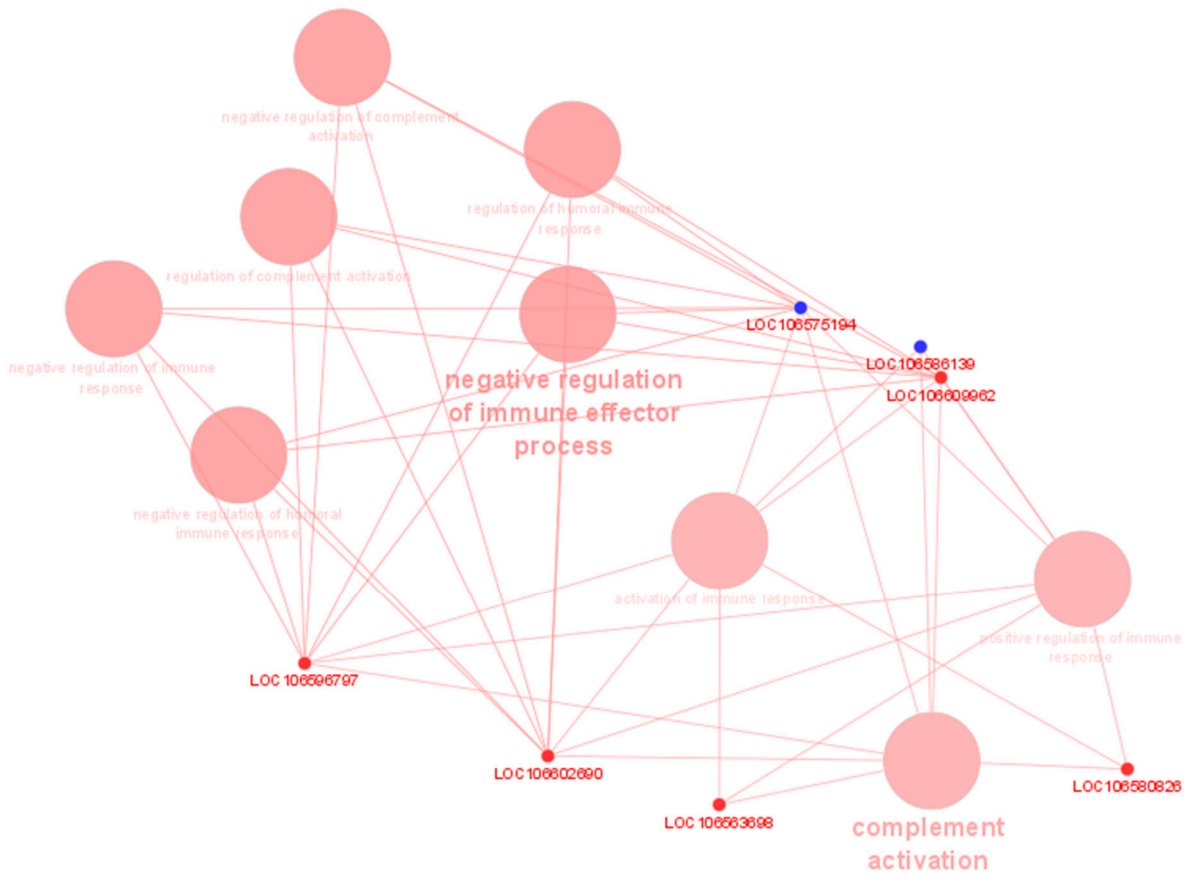

Figure S1. Immune system process pathway analysis of serum samples using the Cluego app (v2.5.7) in Cytoscape (v1.5.7) demonstrated upregulation of pro-immune pathways at 3, 4 and 7 dpi (A-C). Immune enrichment was absent at 9 dpi, but was restored by 11dpi (D). At 11dpi and 14 dpi, the pro-immune pathway upregulation was accompanied by an elevation of various pathways which negatively regulate immunity (D, E). A  $P$  value of  $<0.05$  and kappa coefficient of 0.4 were considered as threshold values. The size of the nodes reflects the statistical significance of the terms. No immune pathway enrichment was detected at any timepoint in gill samples.
